# Supplementary material for: Comparative study of three commonly used continuous deterministic methods for modeling gene regulation networks
Source: Springer Nature journal article supplement (doi:10.1186/1471-2105-11-459), 2010-09-14
Supplement: 12859_2010_3916_MOESM1_ESM.pdf [file 12859_2010_3916_MOESM1_ESM.pdf]

## Static GRN Models

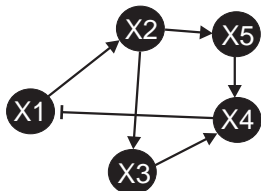

Step 1

*construct manually*

*construct from literature*

## Dynamic GRN Models (reference models)

$$\dot{X}_1 = f(X_1, X_2, \dots, p_{11}, p_{12}, \dots)$$

$$\dot{X}_2 = f(X_1, X_2, \dots, p_{21}, p_{22}, \dots)$$

## Dynamic data

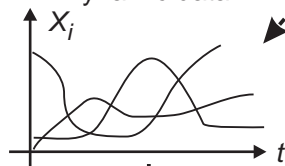

Step 2

*Data from yeast biological network  
(Cantone et al. 2009)*

*execute/simulate models*

*reverse-engineer models*

Step 3

## Dynamic GRN Models

$$\dot{X}_1 = f(X_1, X_2, \dots, p_{11}, p_{12}, \dots)$$

$$\dot{X}_2 = f(X_1, X_2, \dots, p_{21}, p_{22}, \dots)$$

Step 4

- Predictive power on training data,  $P_{ver}$
- Inferential power,  $P_{inf}$  (model parameters)
- Qualitative evaluation (GRN features)

*verify models*

Step 5

- Predictive power on unseen data,  $P_{val}$

*validate models*
