# Supplementary material for: Comparative study of three commonly used continuous deterministic methods for modeling gene regulation networks
Source: Springer Nature journal article supplement (doi:10.1186/1471-2105-11-459), 2010-09-14
Supplement: 12859_2010_3916_MOESM2_ESM.pdf [file 12859_2010_3916_MOESM2_ESM.pdf]

**A**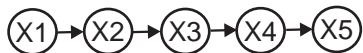**Case Study Model A****B**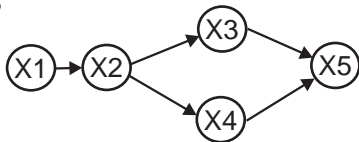**Case Study Model B****C**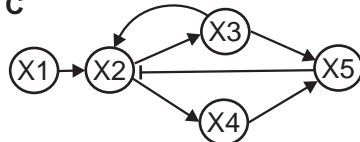**Case Study Model C****D**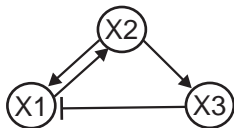**Vohradsky 2001 Model****E**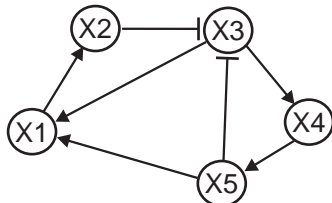**Hlavacek 1996 Model****F**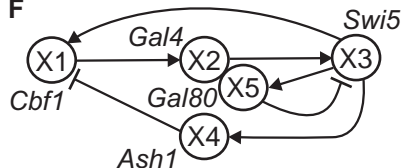**Yeast Model, Cantone et al. 2009****Legend:**

→ *Transcriptional regulation (activating)*

—| *Transcriptional regulation (repressing)*
