# Supplementary material for: Comparative study of three commonly used continuous deterministic methods for modeling gene regulation networks
Source: Springer Nature journal article supplement (doi:10.1186/1471-2105-11-459), 2010-09-14

Initial Conditions

$$\begin{matrix} X1(t=0) \\ X2(t=0) \\ X3(t=0) \end{matrix}$$

*input*

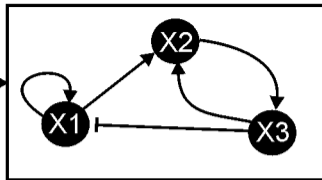

*predict*

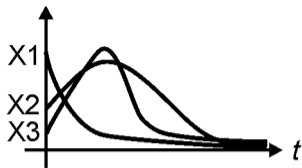

Time-Course Data

$$X1(t=0), X1(t=1), X1(t=2), \dots$$

$$X2(t=0), X2(t=1), X2(t=2), \dots$$

$$X3(t=0), X3(t=1), X3(t=2), \dots$$

*input*

**Node Model**

$$X1(t) \rightarrow X1$$

$$X2(t) \rightarrow X1$$

$$X3(t) \rightarrow X1$$

$$X1(t) \rightarrow X2$$

$$X2(t) \rightarrow X2$$

$$X3(t) \rightarrow X2$$

$$X1(t) \rightarrow X3$$

$$X2(t) \rightarrow X3$$

$$X3(t) \rightarrow X3$$

*predict*

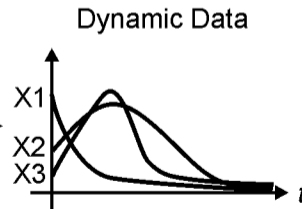

Supplement: 12859_2010_3916_MOESM7_ESM.pdf [file 12859_2010_3916_MOESM7_ESM.pdf]
