# Supplementary material for: Comparative study of three commonly used continuous deterministic methods for modeling gene regulation networks
Source: Springer Nature journal article supplement (doi:10.1186/1471-2105-11-459), 2010-09-14

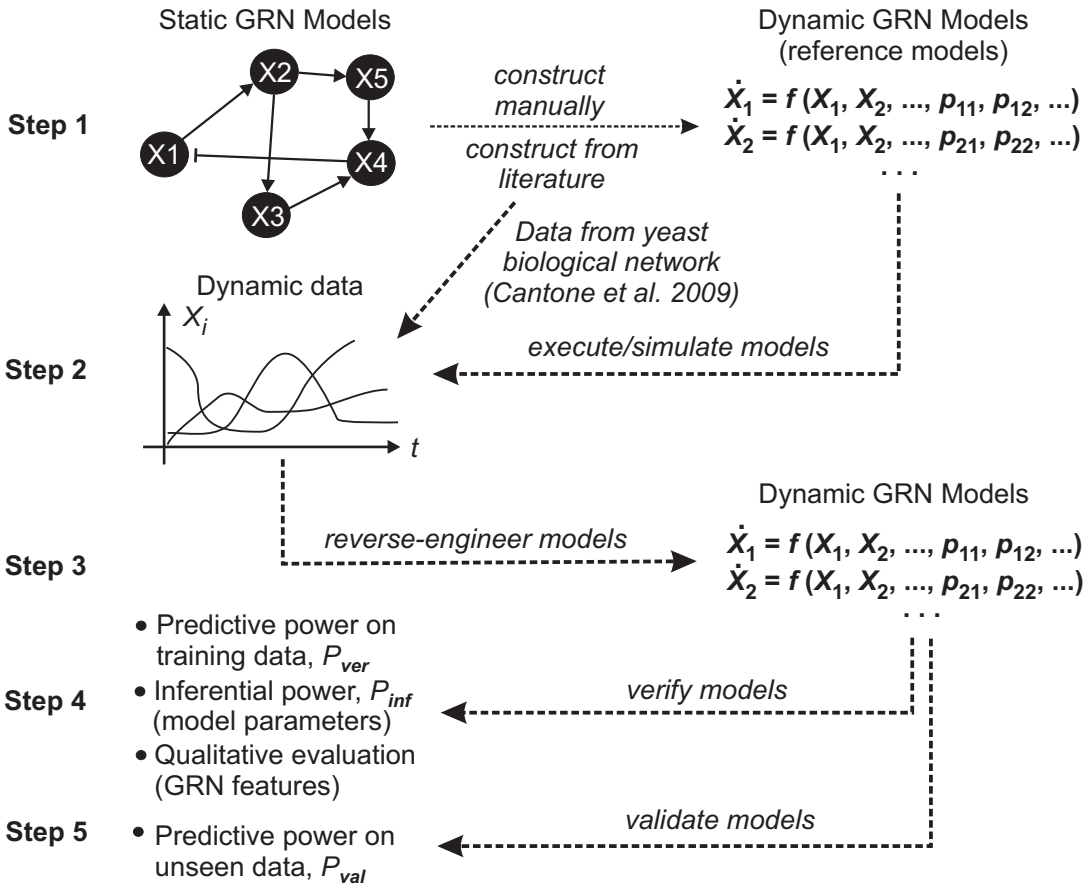

Supplement: 12859_2010_3916_MOESM13_ESM.pdf [file 12859_2010_3916_MOESM13_ESM.pdf]
